# Supplementary material for: A persistent invasive phenotype in post-hypoxic tumor cells is revealed by fate mapping and computational modeling
Source: PubMed Central journal article supplement (PMC8449249; doi:10.1016/j.isci.2021.102935), 2021-08-04
Supplement: mmc1.pdf [file mmc1.pdf]

**iScience, Volume 24**

**Supplemental information**

**A persistent invasive phenotype in post-hypoxic  
tumor cells is revealed by fate mapping  
and computational modeling**

**Heber L. Rocha, Inês Godet, Furkan Kurtoglu, John Metzcar, Kali  
Konstantinopoulos, Soumitra Bhoyar, Daniele M. Gilkes, and Paul Macklin**

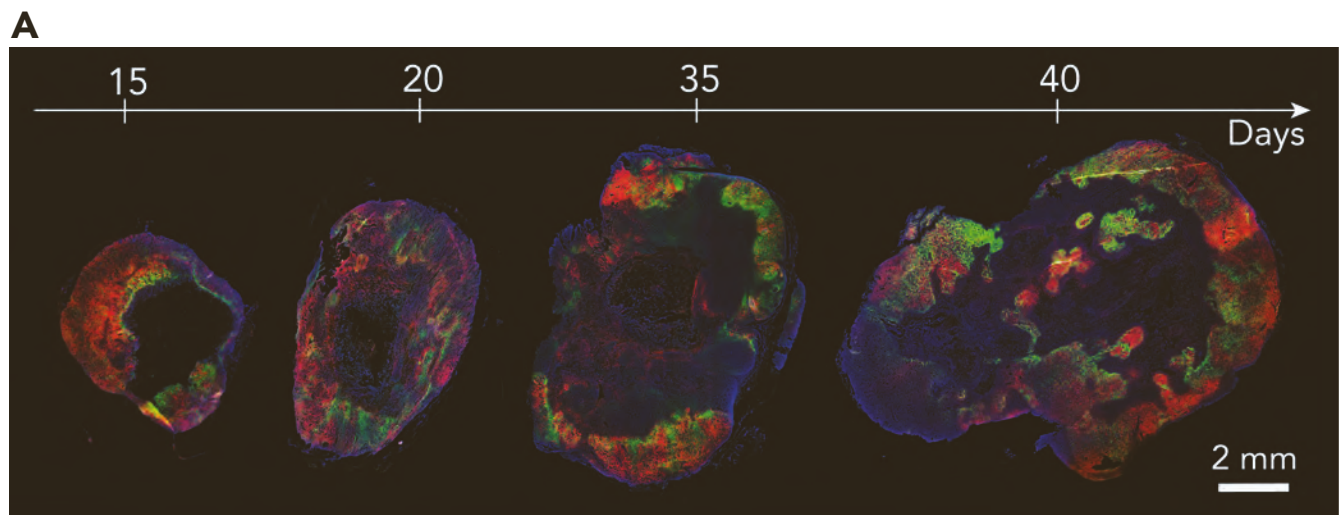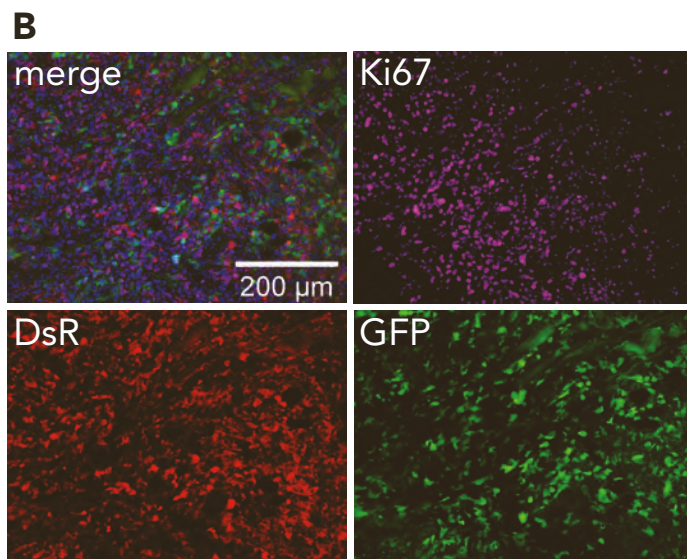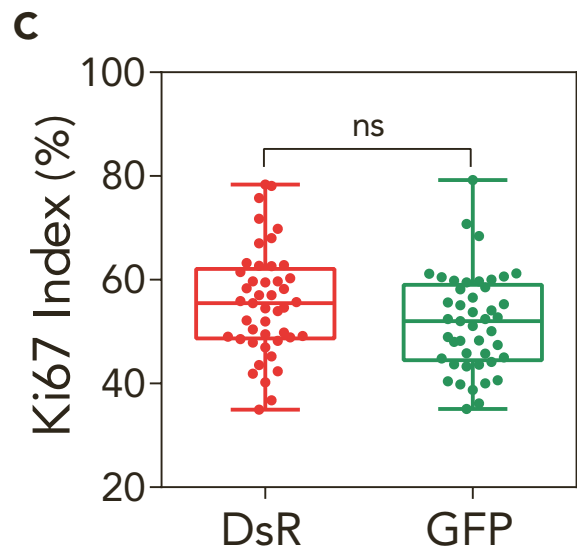

**Figure S1. Fate-mapping intratumoral hypoxia and proliferation analysis, Related to Figure 2.** (A) Fluorescent images of the full cross-sections of orthotopic tumors derived from MDA-MB-231 hypoxia fate-mapping cells. Tumors were excised at days 15, 20, 35 and 40 of the time course. (B-C) Representative fluorescent image (B) and quantification (C) of Ki67 staining in DsRed+ and GFP+ cells in a tumor section.

| Parameter      | Meaning                                                      | Value                                  | Reference                        |
|----------------|--------------------------------------------------------------|----------------------------------------|----------------------------------|
| $U$            | oxygen consumption rate by cells                             | $10 \text{ min}^{-1}$                  | Ghaffarizadeh <i>et al.</i> 2016 |
| $D$            | oxygen diffusion coefficient                                 | $10^5 \mu\text{m}^2/\text{min}$        | Ghaffarizadeh <i>et al.</i> 2016 |
| $\lambda$      | oxygen natural decay                                         | $0.1 \text{ min}^{-1}$                 | Ghaffarizadeh <i>et al.</i> 2016 |
| $\sigma_0$     | initial oxygen pressure                                      | $45.94 \text{ mmHg}$                   | Estimated                        |
| $\bar{\sigma}$ | oxygen pressure at the edges of tumor                        | $45.94 \text{ mmHg}$                   | Godet <i>et al.</i> 2019         |
| Initial_radius | radius of the initial tumor                                  | $250 \mu\text{m}$                      | Estimated                        |
| $\bar{r}_{01}$ | transition rate from Ki67- to Ki67+                          | $3.63 \times 10^{-3} \text{ min}^{-1}$ | Ghaffarizadeh <i>et al.</i> 2018 |
| $r_{10}$       | transition rate from Ki67+ to Ki67-                          | $1.07 \times 10^{-3} \text{ min}^{-1}$ | Ghaffarizadeh <i>et al.</i> 2018 |
| $\sigma_S$     | oxygen pressure threshold to signal proliferation saturation | $38 \text{ mmHg}$                      | Estimated                        |
| $\sigma_T$     | min oxygen pressure threshold to signal proliferation        | $6 \text{ mmHg}$                       | Estimated                        |
| $\sigma_H$     | oxygen pressure threshold to signal hypoxia                  | $10 \text{ mmHg}$                      | Godet <i>et al.</i> 2019         |
| $\alpha_i$     | protein production rate                                      | $4.8 \times 10^{-4} \text{ min}^{-1}$  | Estimated                        |
| $\beta_i$      | protein degradation rate                                     | $6.9 \times 10^{-5} \text{ min}^{-1}$  | Estimated                        |

**Table S1. Parameter values utilized in the simulations of the computational model, Related to Figure 4.**

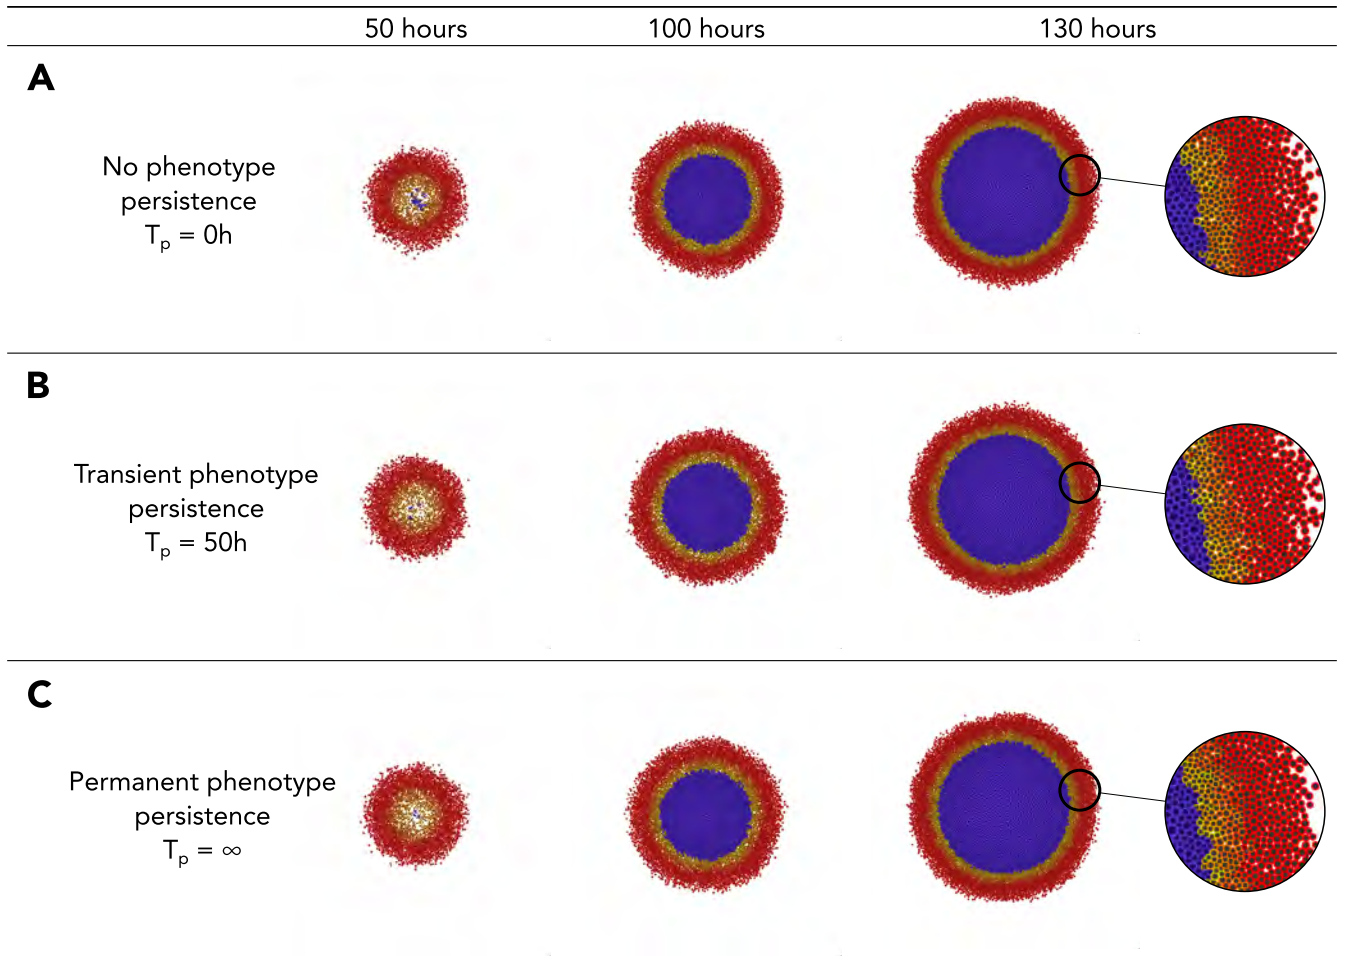

**Figure S2. Impact of phenotypic persistence time with migratory bias fixed ( $b = 0.1791$ ), Related to Figure 4. (A) No phenotypic persistence ( $T_p = 0$ ). (B) Intermediate phenotypic persistence ( $T_p = 50 \text{ h}$ ). (C) Permanent phenotypic persistence ( $T_p = \infty$ ).**

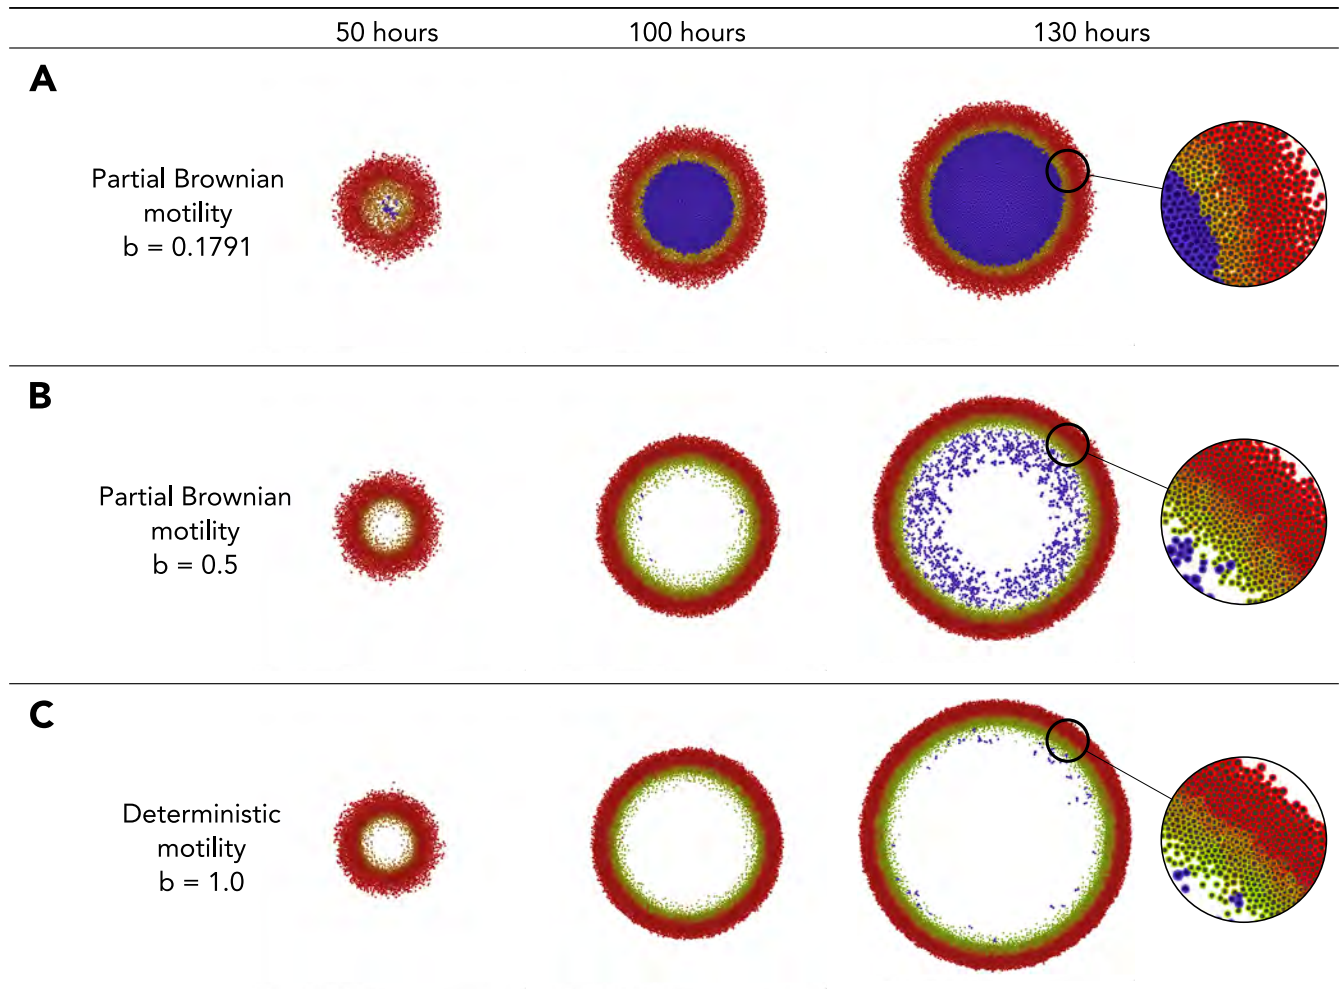

**Figure S3. Impact of migratory bias without phenotypic persistence ( $T_p = 0$ ), Related to Figure 4.** (A) The motility bias generates a partial Brownian motility ( $b = 0.1791$ ). (B) Intermediate motility bias achieves a more directed migration ( $b = 0.5$ ). (C) Completely polarized movement ( $b = 1.0$ ).

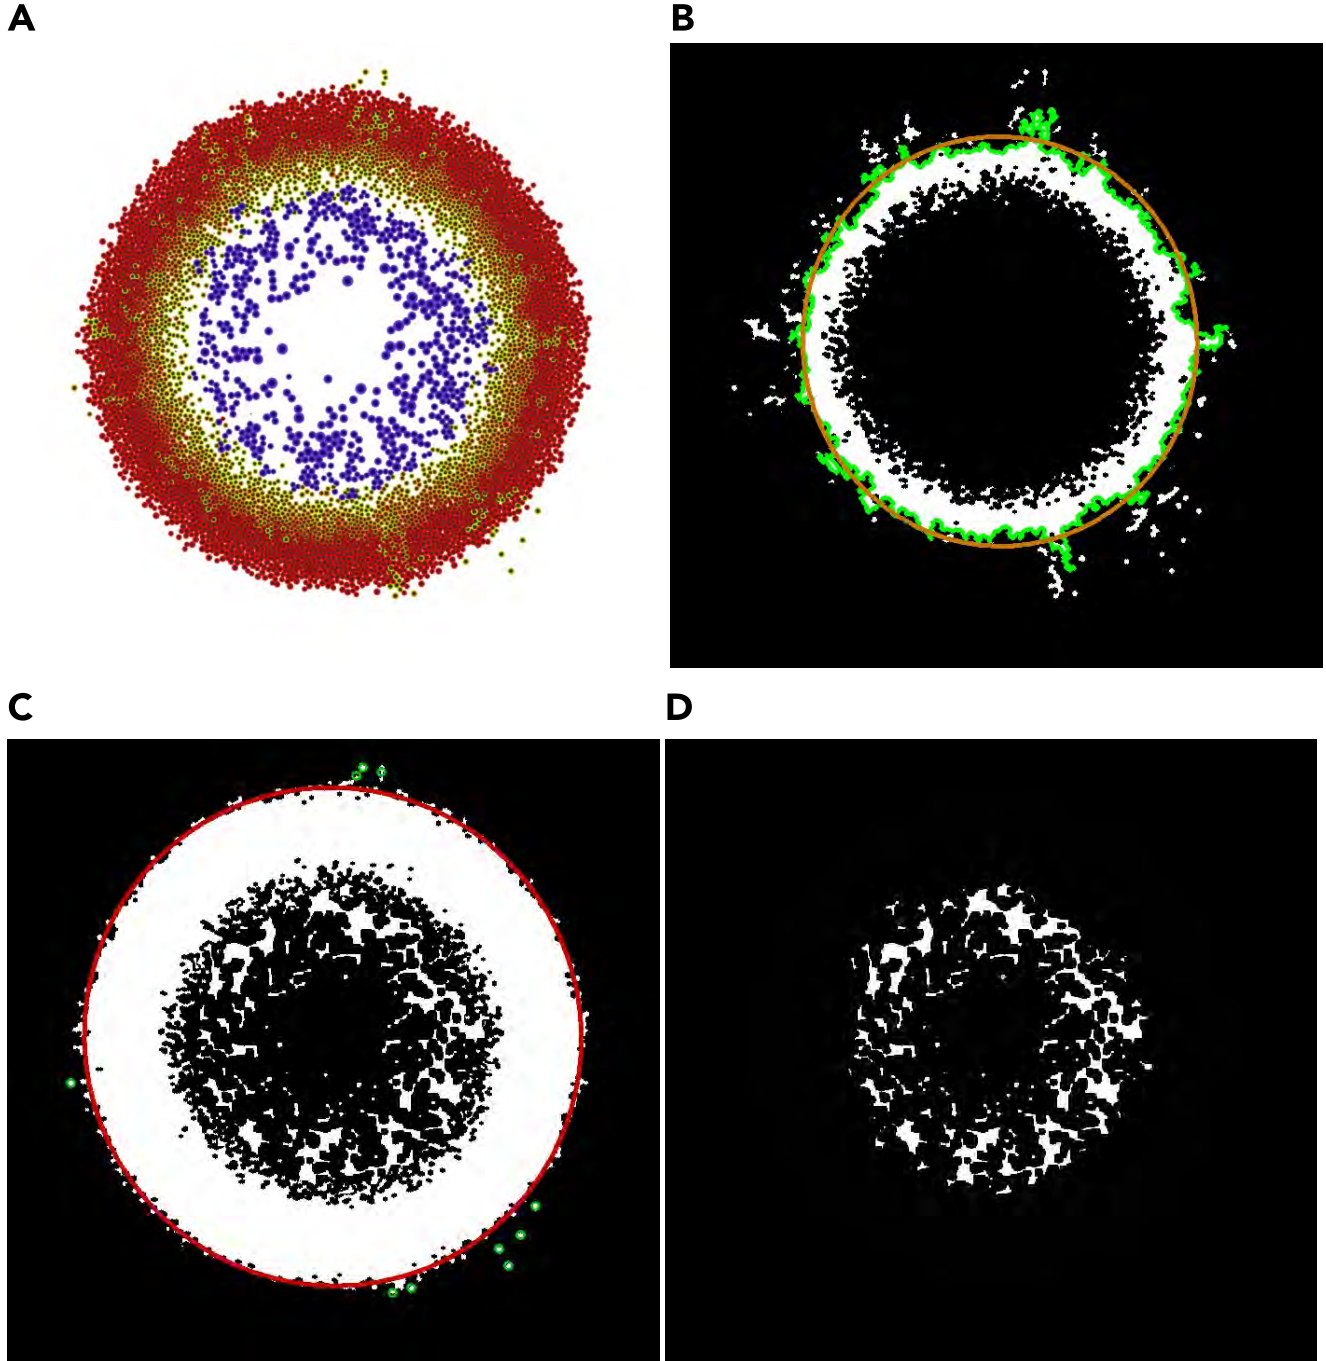

**Figure S4. Image classifier output, Related to STAR Methods.** (A) Output of the model using one simulation of the model at 100 hours with  $F_r = 50\%$ ,  $b^* = 0.5$ , and  $T_p = 50h$ . (B) Image of the Boolean test for plumes. The function  $\mathcal{F}_G$  in green and ellipse  $\mathcal{E}_G$  in orange. (C) Image of the Boolean test for escaping cells. The ellipse  $\mathcal{E}_T$  fitting the tumor in red, and the GFP+ cells escaping the tumor in green. (D) Image of necrotic area.

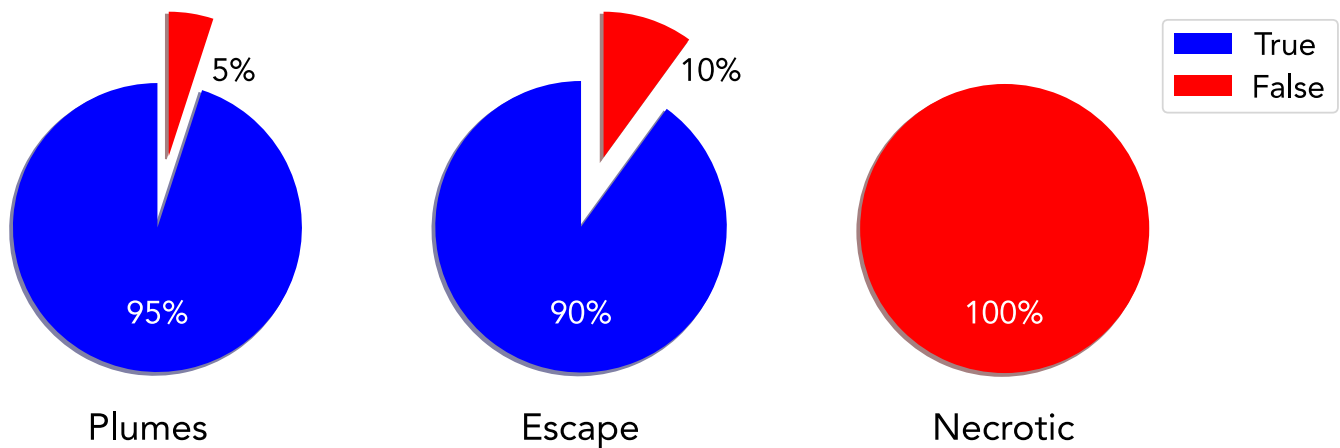

**Figure S5. Boolean image classification, Related to STAR Methods.** Percentage of the Boolean image classification of 20 replicates of the model (associated to 100h of tumor evolution), when  $F_r = 50\%$ ,  $b^* = 0.5$ , and  $T_p = 50h$ .

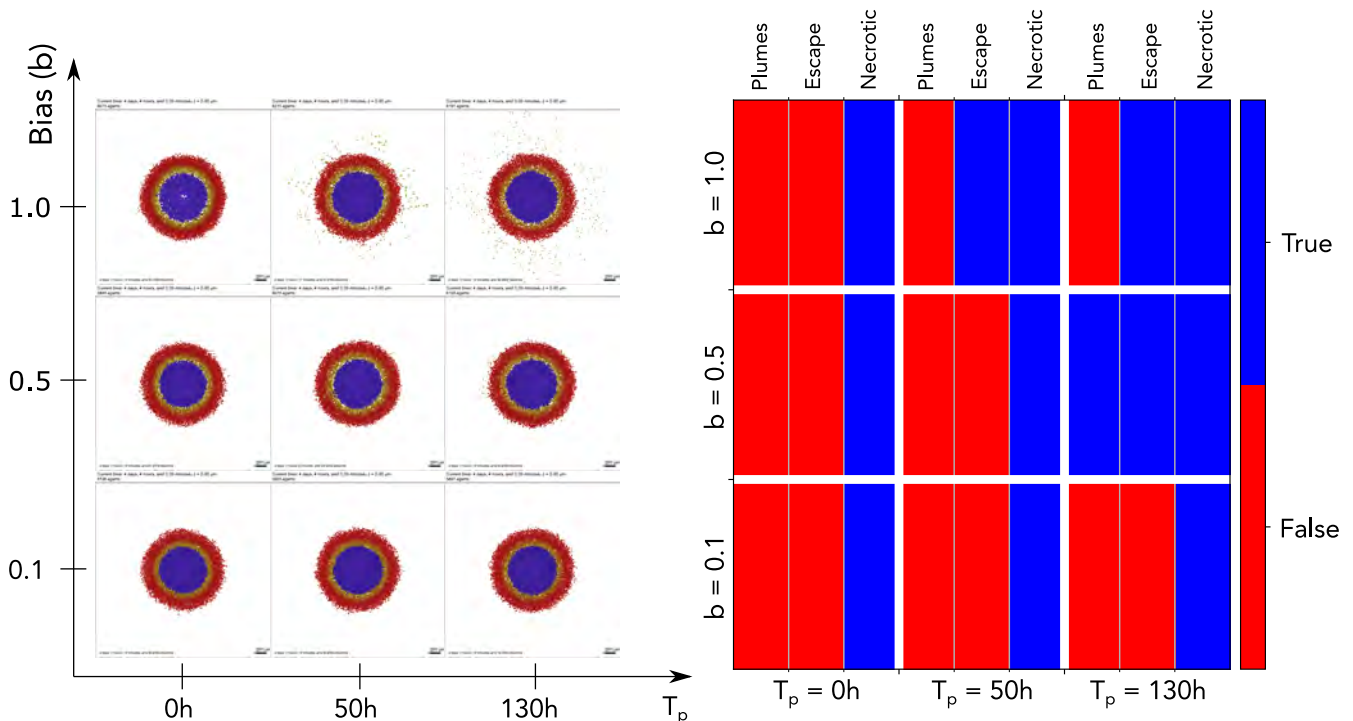

**Figure S6. Study varying  $b$  and  $T_p$  with  $F_r = 10\%$ , Related to STAR Methods.** Images resultant from the proposed model (left) and associated Boolean classification (right). All simulations were evaluated at 100 hours after the initial condition.

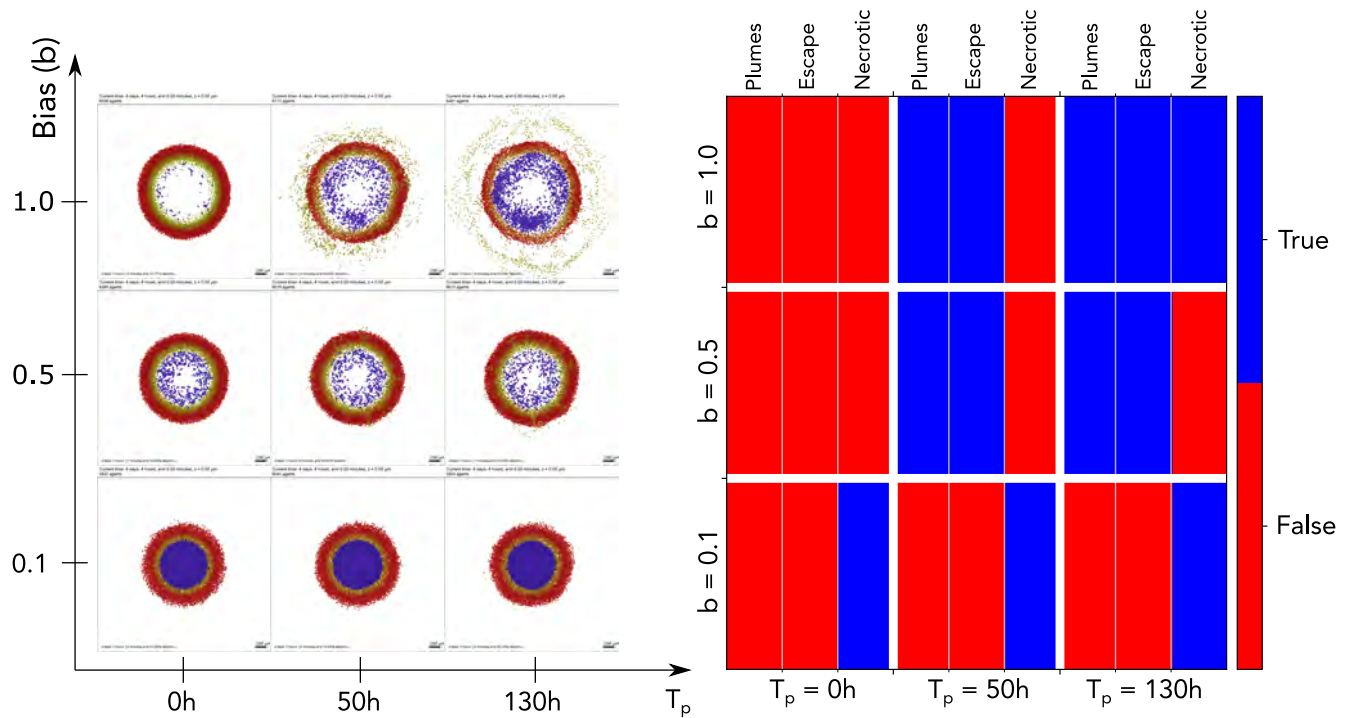

**Figure S7. Study varying  $b$  and  $T_p$  with  $F_r = 50\%$ , Related to STAR Methods.** Images resultant from the proposed model (left) and associated Boolean classification (right). All simulations were evaluated at 100 hours after the initial condition.

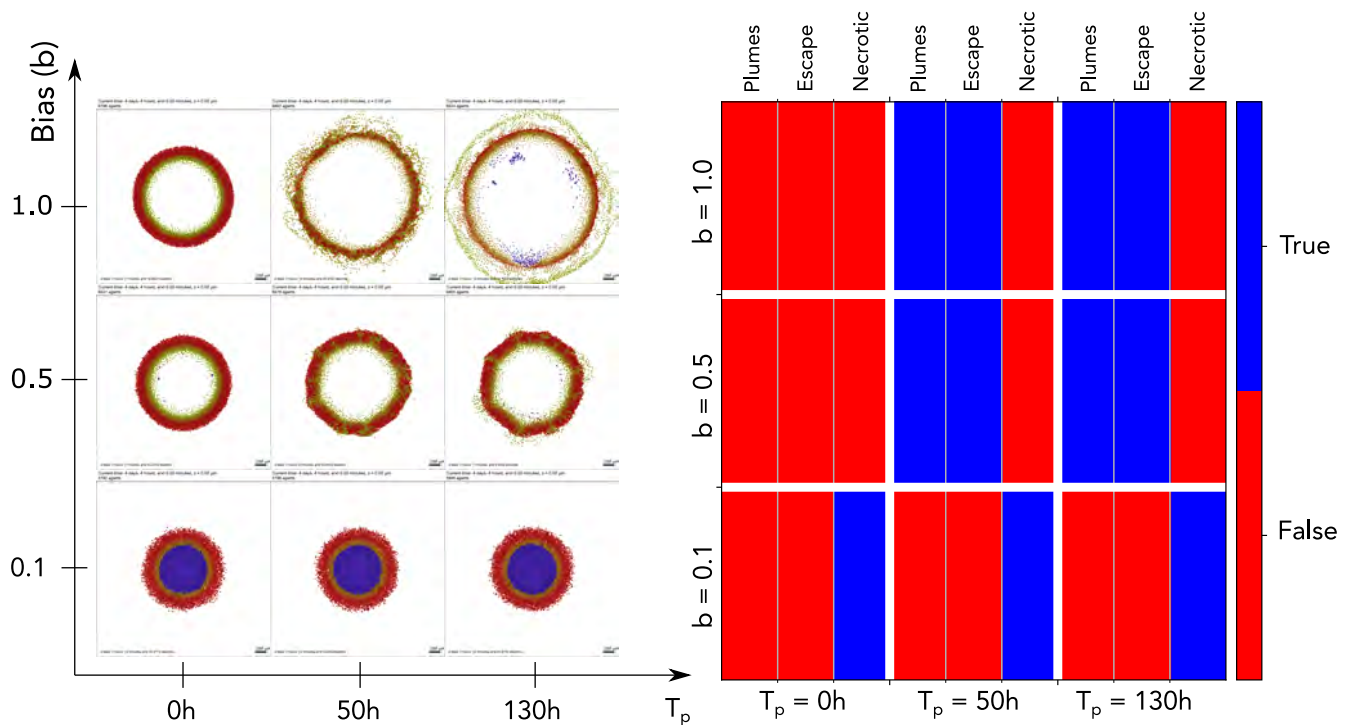

**Figure S8. Study varying  $b$  and  $T_p$  with  $F_r = 100\%$ , Related to STAR Methods.** Images resultant from the proposed model (left) and associated Boolean classification (right). All simulations were evaluated at 100 hours after the initial condition.

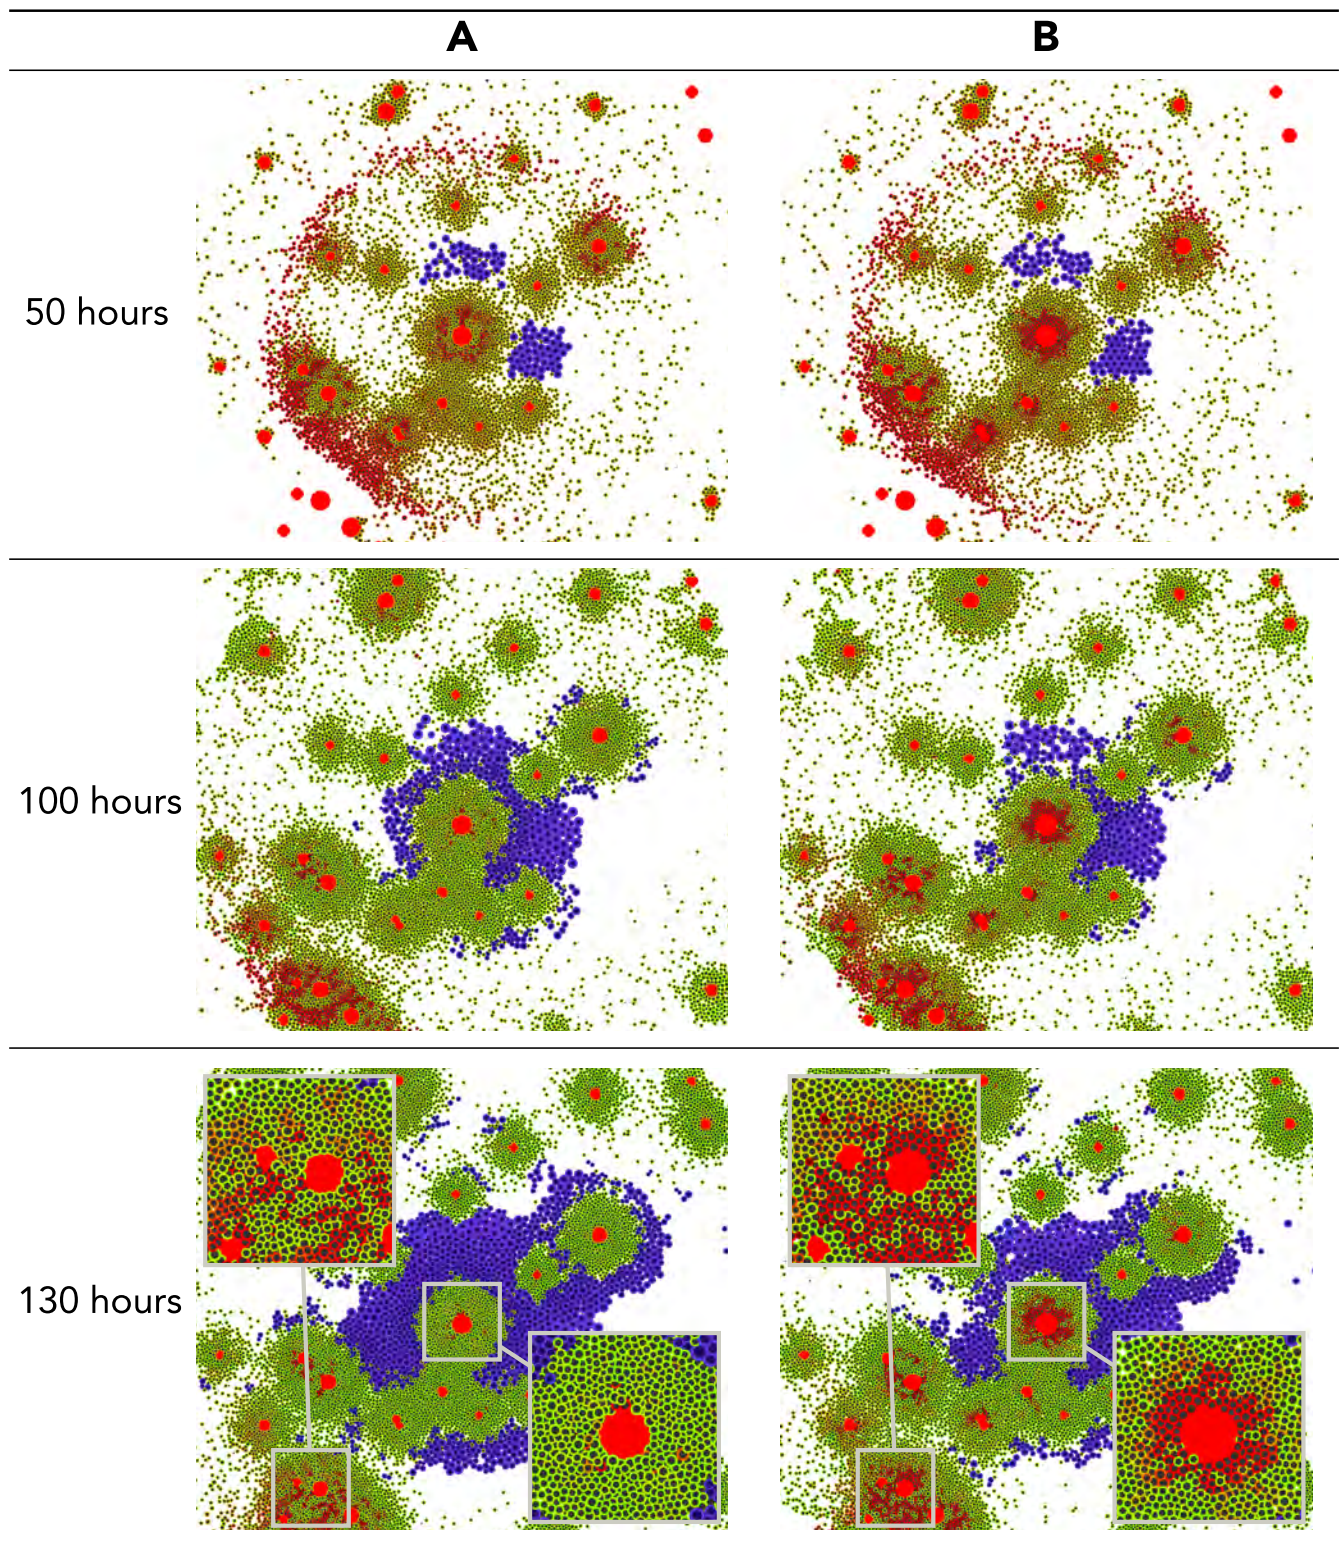

**Figure S9. Impact of heterogeneous and multiple oxygen sources, Related to STAR Methods.** (A-B) The simulation of the model for the case in which we arranged oxygen sources randomly in the computational domain, (A) adopting  $F = 50$ ,  $b = 0.5$ , and  $T_p = 50 h$ ; and (B) adding mechanical feedback on proliferation and migration.
